# Supplementary material for: Parameter free evaluation of SN2 reaction rates for halide substitution in halomethane
Source: Royal Society of Chemistry journal article supplement (doi:10.1039/d1cp05220a), 2022-01-01
Supplement: d1cp05220a1.pdf [file d1cp05220a1.pdf]

## ELECTRONIC SUPPLEMENTARY INFORMATION

### Parameter free evaluation of $S_N2$ reactions rates for the substitution of halides to halomethanes

Marco Bortoli,<sup>a‡</sup> Jonatan Campeggio,<sup>b‡</sup> Laura Orian,<sup>c</sup> Mirco Zerbetto <sup>\*c</sup> and Antonino Polimeno <sup>c</sup>

<sup>a</sup> Institut de Química Computacional i Catàlisi (IQCC) i Departament de Química, Facultat de Ciències, Universitat de Girona, C/M. A. Capmany 69, 17003 Girona, Spain

<sup>b</sup> Afferenza di Jonathan.

<sup>c</sup> Dipartimento di Scienze Chimiche, Università degli Studi di Padova, Via Marzolo 1, Padova, Italy. Fax: +39 049 8275050; Tel: +39 049 8275678; E-mail: mirco.zerbetto@unipd.i

#### Contents

|                                                                                                                      |          |
|----------------------------------------------------------------------------------------------------------------------|----------|
| <b>Table 1 Coordinates of the investigated halides and halomethanes. Level of theory COSMO-ZORA-OLYP/(A)TZ .....</b> | <b>2</b> |
|----------------------------------------------------------------------------------------------------------------------|----------|

**Table 1** Coordinates (expressed in Å) of the investigated halides and halomethanes.  
Level of theory is COSMO-ZORA-OLYP/(A)TZ

|                                                  |         |         |         |                                                   |         |         |         |
|--------------------------------------------------|---------|---------|---------|---------------------------------------------------|---------|---------|---------|
| <b>CH<sub>3</sub>F</b>                           |         |         |         | I                                                 | 0.0000  | 0.0000  | 2.7034  |
| E = -0.8612 Ha                                   |         |         |         | I                                                 | 0.0000  | 0.0000  | -2.7034 |
| F                                                | 0.0000  | 0.0000  | -2.4252 | C                                                 | 0.0000  | 0.0000  | 0.0000  |
| C                                                | 0.0000  | 0.0000  | -1.0110 | H                                                 | -0.5383 | 0.9323  | 0.0000  |
| H                                                | -0.5191 | 0.8992  | -0.6699 | H                                                 | -0.5383 | -0.9323 | 0.0000  |
| H                                                | -0.5191 | -0.8992 | -0.6699 | H                                                 | 1.0766  | 0.0000  | 0.0000  |
| H                                                | 1.0383  | 0.0000  | -0.6699 | <b>TS3 [Cl---CH<sub>3</sub>---Br]<sup>-</sup></b> |         |         |         |
| <b>CH<sub>3</sub>Cl</b>                          |         |         |         | E = -1.0014 Ha                                    |         |         |         |
| E = -0.7981 Ha                                   |         |         |         | Nimag = -436.45 cm <sup>-1</sup>                  |         |         |         |
| Cl                                               | 0.0000  | 0.0000  | -2.7313 | Cl                                                | 0.0000  | 0.0000  | 2.0563  |
| C                                                | 0.0000  | 0.0000  | -0.9302 | Br                                                | 0.0000  | 0.0000  | -2.7909 |
| H                                                | -0.5179 | 0.8971  | -0.5947 | C                                                 | 0.0000  | 0.0000  | -0.2975 |
| H                                                | -0.5179 | -0.8971 | -0.5947 | H                                                 | -0.5380 | 0.9319  | -0.3034 |
| H                                                | 1.0359  | 0.0000  | -0.5947 | H                                                 | -0.5380 | -0.9319 | -0.3034 |
| <b>CH<sub>3</sub>Br</b>                          |         |         |         | H                                                 | 1.0761  | 0.0000  | -0.3034 |
| E = -0.7759 Ha                                   |         |         |         | <b>TS4 [Cl---CH<sub>3</sub>---I]<sup>-</sup></b>  |         |         |         |
| Br                                               | 0.0000  | 0.0000  | -2.8529 | E = -0.9804 Ha                                    |         |         |         |
| C                                                | 0.0000  | 0.0000  | -0.8902 | Nimag = -419.90 cm <sup>-1</sup>                  |         |         |         |
| H                                                | -0.5193 | 0.8994  | -0.5675 | Cl                                                | 0.0000  | 0.0000  | 2.0967  |
| H                                                | -0.5193 | -0.8994 | -0.5675 | I                                                 | 0.0000  | 0.0000  | -2.9650 |
| H                                                | 1.0386  | 0.0000  | -0.5675 | C                                                 | 0.0000  | 0.0000  | -0.2518 |
| <b>CH<sub>3</sub>I</b>                           |         |         |         | H                                                 | -0.5381 | 0.9320  | -0.2741 |
| E = -0.7555 Ha                                   |         |         |         | H                                                 | -0.5381 | -0.9320 | -0.2741 |
| I                                                | 0.0000  | 0.0000  | -3.0090 | H                                                 | 1.0762  | 0.0000  | -0.2741 |
| C                                                | 0.0000  | 0.0000  | -0.8486 | <b>TS5 [F---CH<sub>3</sub>---Br]<sup>-</sup></b>  |         |         |         |
| H                                                | -0.5197 | 0.9002  | -0.5294 | E = -1.0540 Ha                                    |         |         |         |
| H                                                | -0.5197 | -0.9002 | -0.5294 | Nimag = -466.33 cm <sup>-1</sup>                  |         |         |         |
| H                                                | 1.0395  | 0.0000  | -0.5294 | F                                                 | 0.0000  | 0.0000  | 1.7254  |
| <b>TS1 [I---CH<sub>3</sub>---Br]<sup>-</sup></b> |         |         |         | Br                                                | 0.0000  | 0.0000  | -2.6703 |
| E = -0.9627 Ha                                   |         |         |         | C                                                 | 0.0000  | 0.0000  | -0.2704 |
| Nimag = -393.64 cm <sup>-1</sup>                 |         |         |         | H                                                 | -0.5379 | 0.9316  | -0.2424 |
| Br                                               | 0.0000  | 0.0000  | 2.2121  | H                                                 | -0.5379 | -0.9316 | -0.2424 |
| I                                                | 0.0000  | 0.0000  | -2.9894 | H                                                 | 1.0757  | 0.0000  | -0.2424 |
| C                                                | 0.0000  | 0.0000  | -0.2809 | <b>TS6 [F---CH<sub>3</sub>---Cl]<sup>-</sup></b>  |         |         |         |
| H                                                | -0.5382 | 0.9321  | -0.2947 | E = -1.0730 Ha                                    |         |         |         |
| H                                                | -0.5382 | -0.9321 | -0.2947 | Nimag = -492.13 cm <sup>-1</sup>                  |         |         |         |
| H                                                | 1.0763  | 0.0000  | -0.2947 | F                                                 | 0.0000  | 0.0000  | 1.6900  |
| <b>TS2 [I---CH<sub>3</sub>---I]<sup>-</sup></b>  |         |         |         | Cl                                                | 0.0000  | 0.0000  | -2.5509 |
| E = -0.9424 Ha                                   |         |         |         | C                                                 | 0.0000  | 0.0000  | -0.2937 |
| Nimag = -379.92 cm <sup>-1</sup>                 |         |         |         | H                                                 | -0.5378 | 0.9315  | -0.2626 |
|                                                  |         |         |         | H                                                 | -0.5378 | -0.9315 | -0.2626 |
|                                                  |         |         |         | H                                                 | 1.0756  | 0.0000  | -0.2626 |
